# Supplementary material for: The Role of Anorexia in Resistance and Tolerance to Infections in Drosophila
Source: PLoS Biol. 2009 Jul 14;7(7):e1000150. doi: 10.1371/journal.pbio.1000150 (PMC2701602; doi:10.1371/journal.pbio.1000150)
Supplement: Table S1 — p -Values for rate of feeding in L. monocytogenes infected flies. Flies were infected with live or heat killed L. monocytogenes, medium as a control or left unmanipulated. Flies were placed on food supplemented with a blue dye and the rates of feeding were monitored. A Fisher's exact test to determine the significance at each time point was done and the p-values are reported here. (0.01 MB XLS) [file pbio.1000150.s003.xls]

## Sheet: Sheet1
Figure 1A
Time on blue food	unmmanipulated vs live Listeria	media vs live listeria	unmanipulated vs dead Listeria	media vs dead Listeria
10 min	p < 0.0001	p = 0.0489	p < 0.0001	p = 0.0007
15 min	p < 0.0001	p < 0.0001	p < 0.0001	p < 0.0001
20 min	p < 0.0001	p < 0.0001	p < 0.0001	p = 0.0064
25 min	p = 0.0070	p = 0.0011	p = 0.1997	p = 0.0622
30 min	p < 0.0001	p < 0.0001	p = 0.0081	p = 0.0190
35 min	p < 0.0001	p < 0.0001	p < 0.0001	p < 0.0001
