# Supplementary material for: The Role of Anorexia in Resistance and Tolerance to Infections in Drosophila
Source: PLoS Biol. 2009 Jul 14;7(7):e1000150. doi: 10.1371/journal.pbio.1000150 (PMC2701602; doi:10.1371/journal.pbio.1000150)
Supplement: Table S3 — p -Values for the rate of feeding of E. faecalis infected flies. Flies were infected with live E. faecalis, medium as a control, or left unmanipulated. Feeding was monitored by measuring the rate that flies took a meal. A Fisher's exact test to determine the significance at each time point was done and the p-values are reported here. (0.01 MB XLS) [file pbio.1000150.s004.xls]

## Sheet: Sheet1
Figure 1C
Time on blue food	unmanipulated vs E.faecalis	media vs E. faecalis
10 min	p = 0.0347	p = 0.6696
15 min	p < 0.0001	p = 0.0002
20 min	p = 0.0027	p = 0.0001
25 min	p = 0.3207	p = 0.0336
30 min	p = 0.2370	p = 0.3922
35 min	p = 1.0	p = 0.8433
